# Supplementary material for: Reversible Keap1 inhibitors are preferential pharmacological tools to modulate cellular mitophagy
Source: PubMed Central journal article supplement (PMC5583253; doi:10.1038/s41598-017-07679-7), 2017-09-04
Supplement: 41598_2017_7679_MOESM1_ESM.pdf [file 41598_2017_7679_MOESM1_ESM.pdf]

# Reversible Keap1 inhibitors are preferential pharmacological tools to modulate cellular mitophagy

**Nikolaos D. Georgakopoulos<sup>1,3</sup>, Michele Frison<sup>1</sup>, Maria Soledad Alvarez<sup>1</sup>, H el ene Bertrand<sup>3</sup>, Geoff Wells<sup>3</sup> and Michelangelo Campanella<sup>1,2</sup>**

*<sup>1</sup>Department of Comparative Biomedical Sciences, The Royal Veterinary College, University of London, Royal College Street NW1 0TU, London, United Kingdom*

*<sup>2</sup>University College London Consortium for Mitochondrial Research, Gower Street, WC1 6BT, London, United Kingdom*

*<sup>3</sup>UCL School of Pharmacy, 29/39 Brunswick Square, London, United Kingdom*

To whom correspondence should be addressed:

Dr. Michelangelo Campanella

Email: [mcampanella@rvc.ac.uk](mailto:mcampanella@rvc.ac.uk)

or

Dr. Geoff Wells

Email: [g.wells@ucl.ac.uk](mailto:g.wells@ucl.ac.uk)

# Supplementary Figure 1

A.

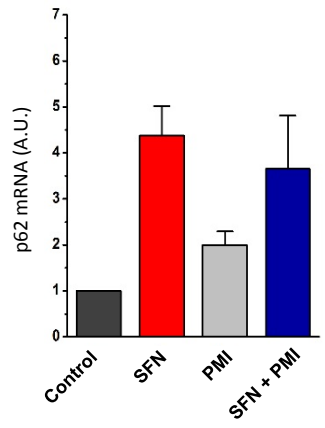

B.

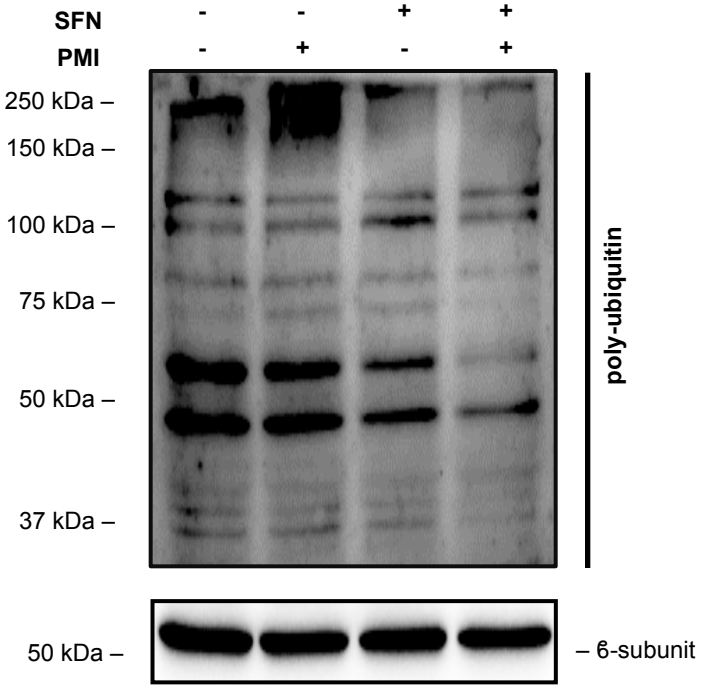

C.

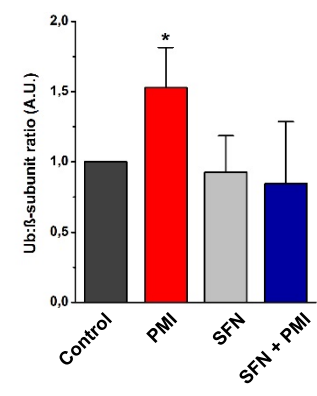

# Supplementary Figure 2

A.

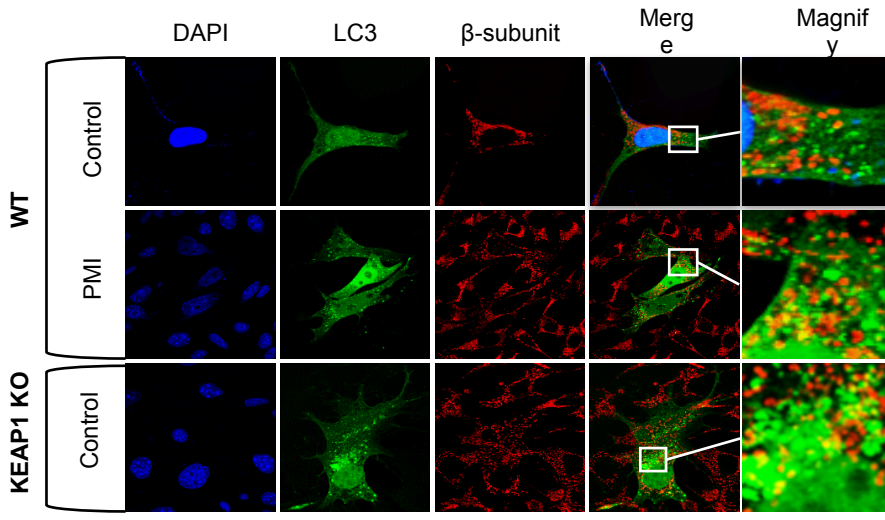

B.

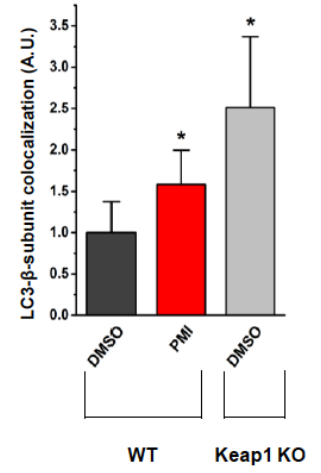

C.

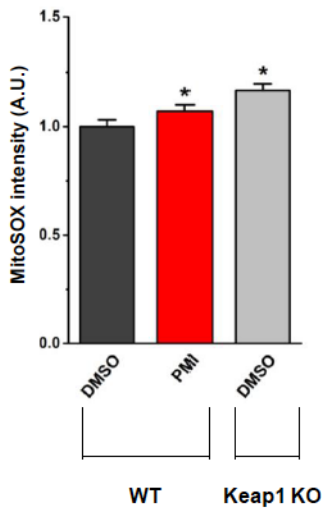

D.

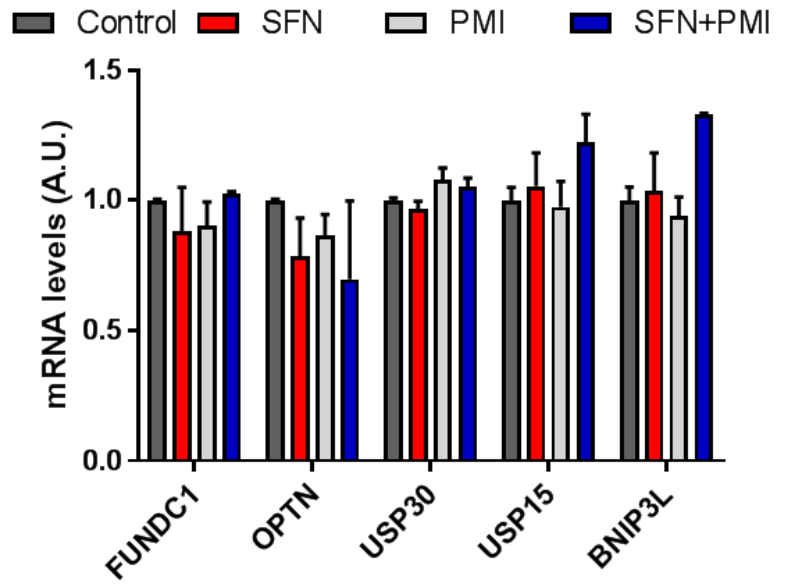

## **Supplementary Figure 1. Differential effects of PMI and SFN on mitochondrial ubiquitination**

(A) Graph showing p62 mRNA levels in MEFs treated with DMSO vehicle control, PMI (10  $\mu$ M) and/or SFN (1  $\mu$ M) for 24 h, n =3. (B) Western blot of mitochondrial fractions, highlighting mitochondrial ubiquitination following 24 h treatments with DMSO vehicle control, PMI (10  $\mu$ M) and/or SFN (1  $\mu$ M).  $\beta$ -subunit is shown as loading control. (C) Graph showing Ub: $\beta$ -subunit ratio band density analysis (n=3, \*p < 0.05). All values are mean  $\pm$  SD.

## **Supplementary Figure 2. Knockout of Keap1 is sufficient to increase mitochondrial superoxide production and induce mitophagy.**

(A) Representative high resolution images of LC3 localisation in WT and KEAP1 KO MEF cells, treated with DMSO vehicle control or 10  $\mu$ M PMI for 24 h. Cells were immunolabeled for LC3 (green) and  $\beta$ -subunit (red). Scale bar represents 10  $\mu$ m. A magnification of the merge images is shown in areas demarcated by the white box. (B) Quantification of the extent of LC3: $\beta$ -subunit co-localization (n > 20, \*p < 0.05). (C) Quantification of mean mitoSOX fluorescence intensity in WT and KEAP1 KO MEF cells, treated with DMSO vehicle control or 10  $\mu$ M PMI for 24 h (n > 20, \*\*\*p < 0.001). (D) Graph showing absence of alterations in mRNA levels of 5 mitophagy receptors in SH-SY5Y cells treated with DMSO vehicle control, 1  $\mu$ M SFN, or 10  $\mu$ M PMI for 8 h.
